# Supplementary material for: Stabilization of the metaphase spindle by Cdc14 is required for recombinational DNA repair
Source: PubMed Central journal article supplement — EMBO J. 2016 Nov 16;36(1):79–101. doi: 10.15252/embj.201593540 (PMC5210157; doi:10.15252/embj.201593540), 2016-11-16
Supplement: EMBJ-36-79-s001.pdf [file EMBJ-36-79-s001.pdf]

# **APPENDIX**

## **Stabilization of the metaphase spindle by Cdc14 is required for recombinational DNA repair.**

María Teresa Villoria<sup>1\*</sup>, Facundo Ramos<sup>1\*</sup>, Encarnación Dueñas<sup>1</sup>, Peter Faul<sup>2</sup>, Pedro Rodriguez Cutillas<sup>2,3</sup>  
and Andrés Clemente-Blanco<sup>1</sup>

### **Appendix Contents:**

- 1. Appendix Table 1**
- 2. Appendix Table 2**
- 3. Appendix Figure 1**

## Appendix Tables

**Appendix Table S1. Genotypes of strains used in this study.**

| Strain | Genotype                                                                                                                                                                                             | Reference  |
|--------|------------------------------------------------------------------------------------------------------------------------------------------------------------------------------------------------------|------------|
| AC40   | <i>MATa leu2 ura3 his3 trp1 ade2 cdc14-1-GFP::KanMX4</i>                                                                                                                                             | L. Aragón  |
| AC224  | <i>MATa-inc HOΔ hml::ADE1 hmr::ADE1 ade1-100 leu2,3,112 lys5 trp1::hisG ura3-52 ade3::GAL::HO arg5,6::MATa::HPH</i>                                                                                  | J. Haber   |
| AC243  | <i>MATα HOΔ ade1-100 leu2,3-112 lys5 ura3-52 trp1::hisG hml::ADE1 hmr::ADE1 ade3::GAL-HO</i>                                                                                                         | J. Haber   |
| AC244  | <i>MATa HOΔ ade1-100 leu2,3-112 lys5 ura3-52 trp1::hisG HMLα hmr::ADE1 ade3::GAL-HO</i>                                                                                                              | J. Haber   |
| AC245  | <i>MATα HOΔ ade1-100 leu2,3-112 lys5 ura3-52 trp1::hisG hml::ADE1 hmr::ADE1 ade3::GAL-HO cdc14-1-GFP::KanMX4</i>                                                                                     | This Study |
| AC248  | <i>MATa HOΔ ade1-100 leu2,3-112 lys5 ura3-52 trp1::hisG HMLα hmr::ADE1 ade3::GAL-HO cdc14-1-GFP::KanMX4</i>                                                                                          | This Study |
| AC263  | <i>MATa HOΔ HMLα HMRA leu2,3,112 his3-11,15 ade2-1 can1-100 ura3-1 trp1-1 bar1::hisG ade3::GAL::HO</i>                                                                                               | J. Haber   |
| AC265  | <i>MATa HOΔ HMLα HMRA leu2,3,112 his3-11,15 ade2-1 can1-100 ura3-1 trp1-1 bar1::hisG ade3::GAL::HO cdc14-1-GFP::KanMX4</i>                                                                           | This Study |
| AC277  | <i>MATa-inc HOΔ hml::ADE1 hmr::ADE1 ade1-100 leu2,3,112 lys5 trp1::hisG ura3-52 ade3::GAL::HO arg5,6::MATa::HPH cdc14-1-GFP::KanMX4</i>                                                              | This Study |
| AC379  | <i>MATα HOΔ ade1-100 leu2,3-112 lys5 ura3-52 trp1::hisG hml::ADE1 hmr::ADE1 ade3::GAL-HO DDC2-GFP::KanMX4 CNM67-RFP::Nat</i>                                                                         | This Study |
| AC417  | <i>MATα HOΔ ade1-100 leu2,3-112 lys5 ura3-52 trp1::hisG hml::ADE1 hmr::ADE1 ade3::GAL-HO DDC2-RFP::Nat CDC14-YFP::HPH CNM67-CFP::KanMX4</i>                                                          | This Study |
| AC427  | <i>MATα HOΔ ade1-100 leu2,3-112 lys5 ura3-52 trp1::hisG hml::ADE1 hmr::ADE1 ade3::GAL-HO cdc14-1-YFP::HPH DDC2-RFP::Nat CNM67-CFP::KanMX4</i>                                                        | This Study |
| AC449  | <i>MATα HOΔ ade1-100 leu2,3-112 lys5 ura3-52 trp1::hisG hml::ADE1 hmr::ADE1 ade3::GAL-HO DDC2-RFP::Nat CDC14-YFP::HPH NUF2-CFP::KanMX4</i>                                                           | This Study |
| AC450  | <i>MATα HOΔ ade1-100 leu2,3-112 lys5 ura3-52 trp1::hisG hml::ADE1 hmr::ADE1 ade3::GAL-HO DDC2-RFP::Nat cdc14-1-YFP::HPH NUF2-CFP::KanMX4</i>                                                         | This Study |
| AC525  | <i>MATa HOΔ ade1-100 leu2,3-112 lys5 ura3-52 trp1::hisG hml::ADE1 hmr::ADE1 ade3::GAL-HO cdc14-1-GFP::KanMX4 SPC110-RFP::Nat</i>                                                                     | This Study |
| AC527  | <i>MATa HOΔ ade1-100 leu2,3-112 lys5 ura3-52 trp1::hisG hml::ADE1 hmr::ADE1 ade3::GAL-HO SPC110-RFP::Nat CDC14-GFP::KanMX4</i>                                                                       | This Study |
| AC582  | <i>MATα HOΔ ade1-100 leu2,3-112 lys5 ura3-52 trp1::hisG hml::ADE1 hmr::ADE1 ade3::GAL-HO DDC2-GFP::KanMX4 CDC14-RFP::Nat NET1-6HA::HPH</i>                                                           | This Study |
| AC603  | <i>MATa-inc HOΔ hml::ADE1 hmr::ADE1 ade1-100 leu2,3,112 lys5 trp1::hisG ura3-52 ade3::GAL::HO arg5,6::MATa::HPH spc110-220::URA3</i>                                                                 | This Study |
| AC606  | <i>MATα HOΔ ade1-100 leu2,3-112 lys5 ura3-52 trp1::hisG hml::ADE1 hmr::ADE1 ade3::GAL-HO DDC2-RFP::Nat CDC14-YFP::HPH CNM67-CFP::KanMX4 spc110-220::URA3</i>                                         | This Study |
| AC612  | <i>MATa HOΔ ade1-100 leu2,3-112 lys5 ura3-52 trp1::hisG hml::ADE1 hmr::ADE1 ade3::GAL-HO SPC110-RFP::Nat CDC14-9Myc::HPH TUB1-GFP::TRP1</i>                                                          | This Study |
| AC613  | <i>MATa HOΔ ade1-100 leu2,3-112 lys5 ura3-52 trp1::hisG hml::ADE1 hmr::ADE1 ade3::GAL-HO cdc14-1-9Myc::HPH SPC110-RFP::Nat TUB1-GFP::TRP1</i>                                                        | This Study |
| AC614  | <i>MATa ade2-1 ura3-1 his3-11,15 trp1-1 can1-100 ade3::pGAL::HO HOcs::KanMX4 near PES4 (ARS604) hml::OropRS hmr::ampr mathOcs::pBR bar1::TRP DDC2-GFP::HPH SPC110-RFP::Nat</i>                       | This Study |
| AC616  | <i>MATa ade2-1 ura3-1 his3-11,15 trp1-1 can1-100 ade3::pGAL::HO HOcs::KanMX4 near PES4 (ARS604) hml::OropRS hmr::ampr bar1::URA3 leu2::TRP1::HOcs trp1::LEU2::HOcs DDC2-GFP::HPH SPC110-RFP::Nat</i> | This Study |
| AC689  | <i>MATa HOΔ ade1-100 leu2,3-112 lys5 ura3-52 trp1::hisG hml::ADE1 hmr::ADE1 ade3::GAL-HO SPC110-6HA::Nat CDC14-GFP::KanMX4</i>                                                                       | This Study |
| AC691  | <i>MATa HOΔ ade1-100 leu2,3-112 lys5 ura3-52 trp1::hisG hml::ADE1 hmr::ADE1 ade3::GAL-HO cdc14-1-GFP::KanMX4 SPC110-6HA::Nat</i>                                                                     | This Study |
| AC693  | <i>MATa HOΔ ade1-100 leu2,3-112 lys5 ura3-52 trp1::hisG hml::ADE1 hmr::ADE1 ade3::GAL-HO SPC110-S36-91A::TRP-6HA::Nat CDC14-GFP::KanMX4</i>                                                          | This Study |
| AC714  | <i>MATa HOΔ ade1-100 leu2,3-112 lys5 ura3-52 trp1::hisG hml::ADE1 hmr::ADE1 ade3::GAL-HO SPC110-S36-91A::TRP-RFP::Nat CDC14-GFP::KanMX4</i>                                                          | This Study |
| AC727  | <i>MATa-inc HOΔ hml::ADE1 hmr::ADE1 ade1-100 leu2,3,112 lys5 trp1::hisG ura3-52 ade3::GAL::HO arg5,6::MATa::HPH SPC110-S36-91A::TRP</i>                                                              | This Study |
| AC751  | <i>MATα HOΔ ade1-100 leu2,3-112 lys5 ura3-52 trp1::hisG hml::ADE1 hmr::ADE1 ade3::GAL-HO DDC2-GFP::KanMX4 CDC14-RFP::Nat SPC110-3HA::HPH</i>                                                         | This Study |
| AC753  | <i>MATα HOΔ ade1-100 leu2,3-112 lys5 ura3-52 trp1::hisG hml::ADE1 hmr::ADE1 ade3::GAL-HO DDC2-GFP::KanMX4 esp1ts::LEU CDC14-RFP::Nat SPC110-3HA::HPH</i>                                             | This Study |

|        |                                                                                                                                                                                                                                                            |            |
|--------|------------------------------------------------------------------------------------------------------------------------------------------------------------------------------------------------------------------------------------------------------------|------------|
| AC851  | <i>MATa</i> HOΔ <i>ade1-100 leu2,3-112 lys5 ura3-52 trp1::hisG hml::ADE1 hmr::ADE1 ade3::GAL-HO</i><br>SPC110-RFP::Nat CDC14-9Myc::HPH NUF2-GFP::KanMX4                                                                                                    | This Study |
| AC853  | <i>MATa</i> HOΔ <i>ade1-100 leu2,3-112 lys5 ura3-52 trp1::hisG hml::ADE1 hmr::ADE1 ade3::GAL-HO</i><br>SPC110-RFP::Nat <i>cdc14-1-9Myc::HPH</i> NUF2-GFP::KanMX4                                                                                           | This Study |
| AC875  | <i>MATa</i> HOΔ <i>ade1-100 leu2,3-112 lys5 ura3-52 trp1::hisG hml::ADE1 hmr::ADE1 ade3::GAL-HO</i><br>SPC110-RFP::Nat CDC14-9Myc::HPH DDC2-GFP::KanMX4                                                                                                    | This Study |
| AC878  | <i>MATa</i> HOΔ <i>ade1-100 leu2,3-112 lys5 ura3-52 trp1::hisG hml::ADE1 hmr::ADE1 ade3::GAL-HO</i><br>SPC110-S36-91A::TRP-RFP::Nat CDC14-9Myc::HPH DDC2-GFP::KanMX4                                                                                       | This Study |
| AC944  | <i>MATa ade2-1 trp1Δ2 can1-100 leu2-3,112 his3-11,15 ura3-52</i> NET1-6HA::HPH                                                                                                                                                                             | This Study |
| AC973  | <i>MATa</i> HOΔ <i>ade1-100 leu2,3-112 lys5 ura3-52 trp1::hisG hml::ADE1 hmr::ADE1 ade3::GAL-HO</i><br>SPC110-RFP::Nat CDC14-9Myc::HPH DYN1-GFP::KanMX4                                                                                                    | This Study |
| AC975  | <i>MATa</i> HOΔ <i>ade1-100 leu2,3-112 lys5 ura3-52 trp1::hisG hml::ADE1 hmr::ADE1 ade3::GAL-HO</i><br>SPC110-S36-91A::TRP-RFP::Nat CDC14-9Myc::HPH DYN1-GFP::KanMX4                                                                                       | This Study |
| AC991  | <i>MATa</i> HOΔ <i>ade1-100 leu2,3-112 lys5 ura3-52 trp1::hisG hml::ADE1 hmr::ADE1 ade3::GAL-HO</i><br>SPC110-RFP::Nat CDC14-9Myc::HPH RAD52-GFP::KanMX4                                                                                                   | This Study |
| AC995  | <i>MATα</i> HOΔ <i>ade1-100 leu2,3-112 lys5 ura3-52 trp::hisG hml::ADE1 hmr::ADE1 ade3::GAL-HO</i><br>CNM67-RFP::Nat CDC14-GFP::KanMX4 DDC2-CFP::TRP                                                                                                       | This Study |
| AC996  | <i>MATa</i> HOΔ <i>ade1-100 leu2,3-112 lys5 ura3-52 trp1::hisG hml::ADE1 hmr::ADE1 ade3::GAL-HO</i><br><i>cdc14-1-9Myc::HPH</i> SPC110-RFP::Nat DYN1-GFP::KanMX4                                                                                           | This Study |
| AC998  | <i>MATα</i> HOΔ <i>ade1-100 leu2,3-112 lys5 ura3-52 trp::hisG hml::ADE1 hmr::ADE1 ade3::GAL-HO</i><br>DDC2-CFP::KanMX4 CDC14-YFP::HPH CNM67-RFP::Nat                                                                                                       | This Study |
| AC1005 | <i>MATa</i> HOΔ <i>ade1-100 leu2,3-112 lys5 ura3-52 trp1::hisG hml::ADE1 hmr::ADE1 ade3::GAL-HO</i><br>SPC110-RFP::Nat CDC14-9Myc::HPH MPS3-GFP::KanMX4                                                                                                    | This Study |
| AC1008 | <i>MATa</i> HOΔ <i>ade1-100 leu2,3-112 lys5 ura3-52 trp1::hisG hml::ADE1 hmr::ADE1 ade3::GAL-HO</i><br><i>cdc14-1-9Myc::HPH</i> SPC110-RFP::Nat MPS3-GFP::KanMX4                                                                                           | This Study |
| AC1018 | <i>MATα</i> HOΔ <i>ade1-100 leu2,3-112 lys5 ura3-52 trp::hisG hml::ADE1 hmr::ADE1 ade3::GAL-HO</i><br>DDC2-GFP::KanMX4 CNM67-RFP::Nat <i>sml1Δ::HPH</i>                                                                                                    | This Study |
| AC1040 | <i>MATα</i> HOΔ <i>ade1-100 leu2,3-112 lys5 ura3-52 trp::hisG hml::ADE1 hmr::ADE1 ade3::GAL-HO</i><br>DDC2-GFP::KanMX4 CNM67-RFP::Nat <i>sml1Δ::HPH rad53Δ::URA3</i>                                                                                       | This Study |
| AC1056 | <i>MATα</i> HOΔ <i>ade1-100 leu2,3-112 lys5 ura3-52 trp::hisG hml::ADE1 hmr::ADE1 ade3::GAL-HO</i><br>CDC14-9Myc::HPH DDC2-YFP::KanMX4 pRS316-MPS3-RFP-URA3 <i>mps3Δ::Nat</i>                                                                              | This Study |
| AC1058 | <i>MATα</i> HOΔ <i>ade1-100 leu2,3-112 lys5 ura3-52 trp::hisG hml::ADE1 hmr::ADE1 ade3::GAL-HO</i><br>CDC14-9Myc::HPH DDC2-YFP::KanMX4 pRS316- <i>mps3Δ2-64-RFP-URA3 mps3Δ::Nat</i>                                                                        | This Study |
| AC1060 | <i>MATα</i> HOΔ <i>ade1-100 leu2,3-112 lys5 ura3-52 trp::hisG hml::ADE1 hmr::ADE1 ade3::GAL-HO</i><br>CDC14-9Myc::HPH DDC2-YFP::KanMX4 pRS316- <i>mps3Δ75-150-RFP-URA3 mps3Δ::Nat</i>                                                                      | This Study |
| AC1062 | <i>MATα</i> HOΔ <i>ade1-100 leu2,3-112 lys5 ura3-52 trp::hisG hml::ADE1 hmr::ADE1 ade3::GAL-HO</i><br><i>cdc14-1-9Myc::HPH</i> DDC2-YFP::KanMX4 pRS316-MPS3-RFP-URA3 <i>mps3Δ::Nat</i>                                                                     | This Study |
| AC1064 | <i>MATα</i> HOΔ <i>ade1-100 leu2,3-112 lys5 ura3-52 trp::hisG hml::ADE1 hmr::ADE1 ade3::GAL-HO</i><br><i>cdc14-1-9Myc::HPH</i> DDC2-YFP::KanMX4 pRS316- <i>mps3Δ2-64-RFP-URA3 mps3Δ::Nat</i>                                                               | This Study |
| AC1066 | <i>MATα</i> HOΔ <i>ade1-100 leu2,3-112 lys5 ura3-52 trp::hisG hml::ADE1 hmr::ADE1 ade3::GAL-HO</i><br><i>cdc14-1-9Myc::HPH</i> DDC2-YFP::KanMX4 pRS316- <i>mps3Δ75-150-RFP-URA3 mps3Δ::Nat</i>                                                             | This Study |
| AC1074 | MAT::HIS3 <i>ade2-1 bar1::LEU2 trp1-1 LYS2 RAD5 RAD52-CFP ura3::3xURA3-tetOx112 I-SceI(ura3-1) his3-11,15::YFP-LacI-his3-x leu2-3,112::LacO-LEU2 HO-iYCL018W(leu2-3,112) TetI-RFP(iYGL119W) cdc14-1-9Myc::HPH</i> CNM67-GFP::KanMX4 pAC59(Gal-I-SceI-ADE2) | This Study |
| AC1077 | MAT::HIS3 <i>ade2-1 bar1::LEU2 trp1-1 LYS2 RAD5 RAD52-CFP ura3::3xURA3-tetOx112 I-SceI(ura3-1) his3-11,15::YFP-LacI-his3-x leu2-3,112::LacO-LEU2 HO-iYCL018W(leu2-3,112) TetI-RFP(iYGL119W) CDC14-9Myc::HPH</i> CNM67-GFP::KanMX4 pAC59(Gal-I-SceI-ADE2)   | This Study |
| AC1086 | <i>MATa</i> HOΔ <i>ade1-100 leu2,3-112 lys5 ura3-52 trp1::hisG hml::ADE1 hmr::ADE1 ade3::GAL-HO</i><br>CDC14-GFP::KanMX4 Net1-6HA::HPH                                                                                                                     | This Study |
| AC1095 | <i>MATa-inc</i> HOΔ <i>hml::ADE1 hmr::ADE1 ade1-100 leu2-3,112 lys5 trp1::hisG ura3-52 ade3::GAL::HO</i><br><i>arg5,6::MATa::HPH</i> SPC110-S36-91A::TRP pRS306-SPC110::URA3                                                                               | This Study |
| AC1200 | <i>MATa</i> HOΔ <i>ade1-100 leu2,3-112 lys5 ura3-52 trp1::hisG hml::ADE1 hmr::ADE1 ade3::GAL-HO</i><br>SPC110-S36-91D::TRP-RFP::Nat CDC14-9Myc::HPH DDC2-GFP::KanMX4                                                                                       | This Study |
| AC1204 | <i>MATa-inc</i> HOΔ <i>hml::ADE1 hmr::ADE1 ade1-100 leu2-3,112 lys5 trp1::hisG ura3-52 ade3::GAL::HO</i><br><i>arg5,6::MATa::HPH</i> SPC110-S36-91D::TRP                                                                                                   | This Study |
| AC1216 | <i>MATa</i> HOΔ <i>ade1-100 leu2,3-112 lys5 ura3-52 trp1::hisG hml::ADE1 hmr::ADE1 ade3::GAL-HO</i><br>SPC110-S36-91D::TRP-6HA::Nat CDC14-GFP::KanMX4                                                                                                      | This Study |

**Appendix Table S2. Oligonucleotides used for probes synthesis.**

| <b>Name</b>   | <b>Sequence</b>         | <b>Used in</b>            |
|---------------|-------------------------|---------------------------|
| Mata Distal 1 | CATGCGGTTACATGACTTTTGAC | <i>MATa</i> -distal probe |
| Mata Distal 2 | AGGATGCCCTTGTTTTGTTACTG | <i>MATa</i> -distal probe |
| Mata Only 1   | TTTGTCTTTTCGGGGAAACTG   | <i>MATa</i> probe         |
| Mata Only 2   | GTACAAACACATCTTCCAATA   | <i>MATa</i> probe         |
| His3 probe 1  | GAGCAGAAAGCCCTAGTAAAG   | His3 probe                |
| His3 probe 2  | TAAGAACACCTTTGGTGGAGG   | His3 probe                |
| Act1 probe 1  | CGAACAAGAAATGCAAACCGC   | Actin probe               |
| Act1 probe 2  | CTTGTGGTGAACGATAGATGG   | Actin probe               |

# Appendix Figure S1

A

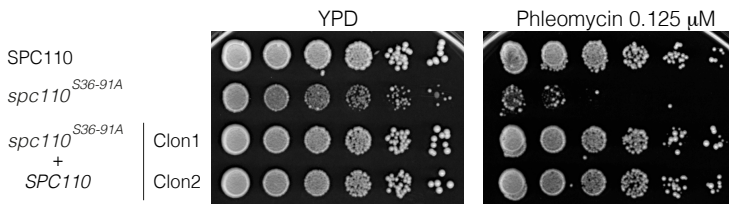

B

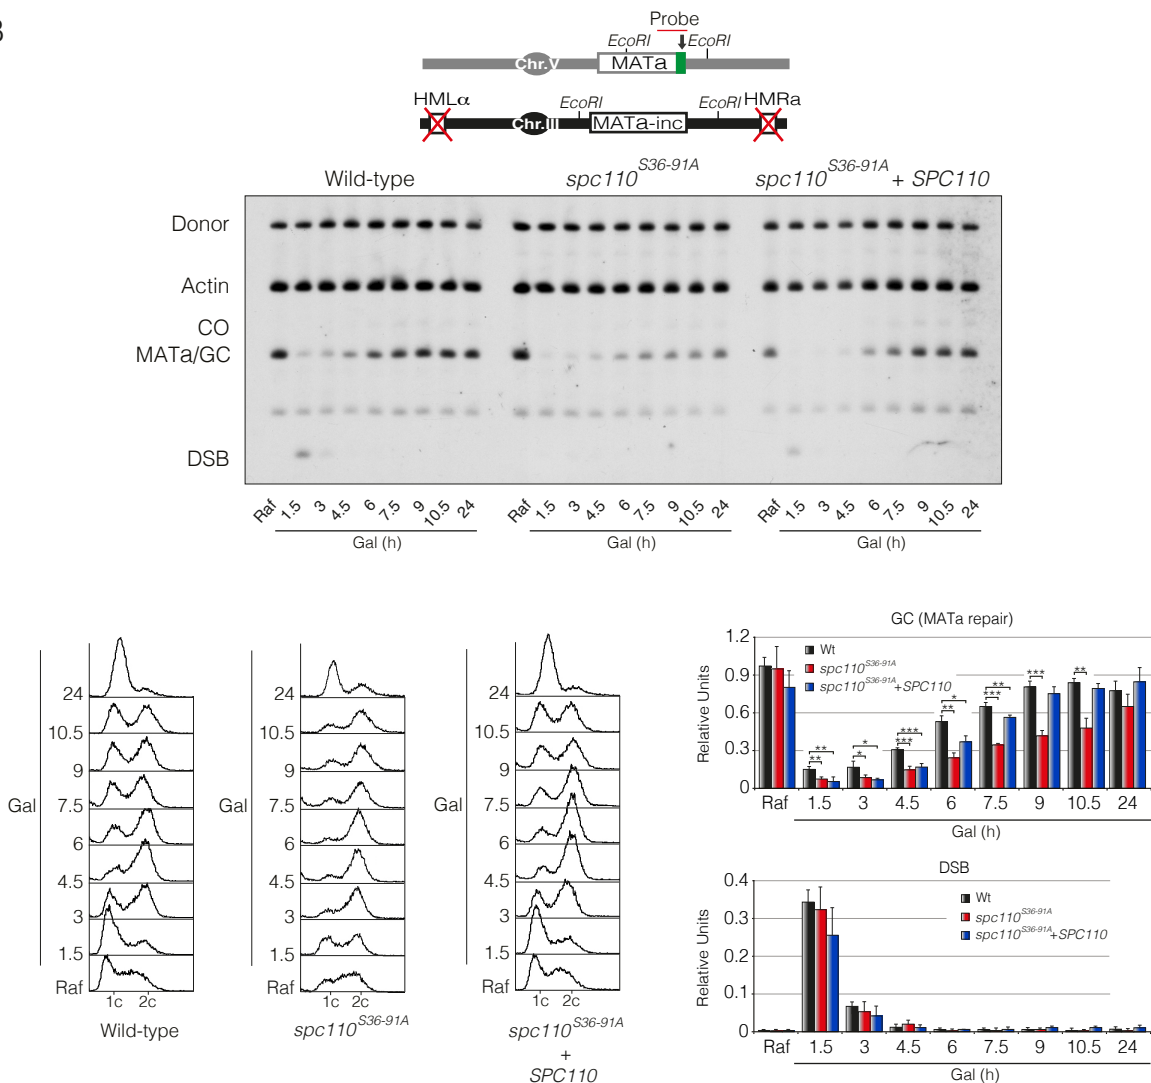

**Appendix Figure S1. The DNA repair defects of *spc110*<sup>S36-91A</sup> cells are complemented when a wild-type copy of *SPC110* is expressed.**

A) Growth sensitivity to phleomycin of a wild-type strain, an *spc110*<sup>S36-91A</sup> mutant, and two different clones of *spc110*<sup>S36-91A</sup> expressing a wild-type copy of *SPC110* under its own promoter. Ten-fold serial dilutions from overnight cultures were plated onto YPD or YPD containing 0.125 μM of phleomycin at 30°C.

B) Southern blot analysis of a wild-type, an *spc110*<sup>S36-91A</sup> mutant, and an *spc110*<sup>S36-91A</sup> mutant expressing a wild-type copy of *SPC110*. Overnight cultures of cells harbouring the inter-chromosomal gene conversion assay were induced by adding galactose at 32°C to express the HO endonuclease. Samples were collected at the depicted time-points, DNA extracted and digested with *EcoRI*. Blots were probed with *MATa*-only and *ACT1* probes. FACS profiles for DNA content are included. Graphs show the average values for gene conversion, DSB induction and crossover vs non-crossover ratio. All data were normalized using the actin signal as loading control. Graphs represent the mean ± S.D. from three independent experiments. *P* values were calculated using a 2-tailed unpaired Student *t* test. \**P*≤0.05; \*\**P*≤0.01; \*\*\**P*≤0.001.

Data information: DSB, double-strand break. Raf, raffinose. Gal, galactose. GC, gene conversion. CO, crossover.
