# Supplementary material for: Stabilization of the metaphase spindle by Cdc14 is required for recombinational DNA repair
Source: PubMed Central journal article supplement — EMBO J. 2016 Nov 16;36(1):79–101. doi: 10.15252/embj.201593540 (PMC5210157; doi:10.15252/embj.201593540), 2016-11-16

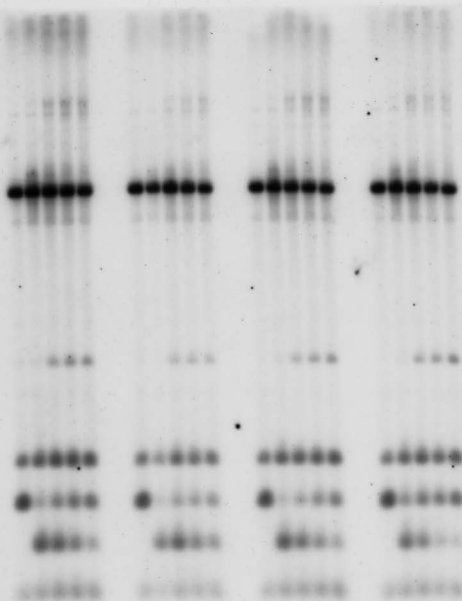

wt  
 R9 246  
 glr

yaadΔ  
 R9 246  
 glr

mms4Δ  
 R9 246  
 glr

yaadΔ mms4Δ  
 R9 246  
 glr

wt 30'

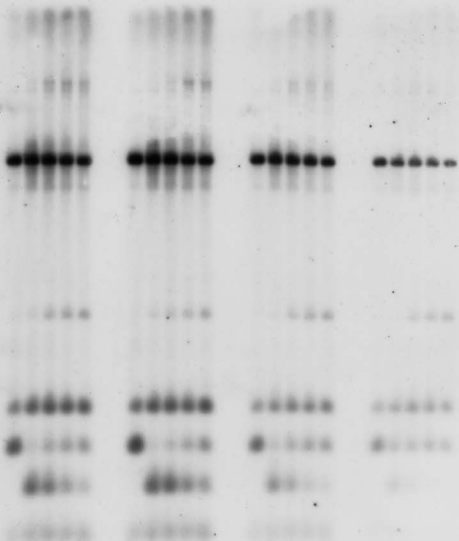

cdcl4-1

cdcl4-1  
7en1S

cdcl4-1  
mm54S

cdcl4-1  
7en1S  
mm54S

R 9  $\frac{246}{\text{flu}}$

R 9  $\frac{246}{\text{flu}}$

R 9  $\frac{246}{\text{flu}}$

R 9  $\frac{246}{\text{flu}}$

cdcl4 30'

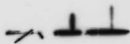

Supplement: EMBJ-36-79-s006.pdf [file EMBJ-36-79-s006.pdf]
